# Supplementary material
Source: publisher figshare collection journal article supplement (https://acs.figshare.com/ndownloader/files/4575028)
Supplement: Supplementary file 1 [file 4575028]

## Supporting Information

### **The electrochemical response of cytochrome *c* immobilized on smooth and roughened silver and gold surfaces chemically modified with 11-mercaptoundecanoic acid**

*Diego Millo, Antonio Ranieri<sup>‡</sup>, Peter Gross<sup>†</sup>, Hoang K. Ly<sup>§</sup>, Marco Borsari<sup>‡</sup>, Peter Hildebrandt<sup>§</sup>, Gijs J. L. Wuite<sup>†</sup>, Cees Gooijer and Gert van der Zwan<sup>\*</sup>*

Department of Analytical Chemistry and Applied Spectroscopy, Laser Centre, Vrije Universiteit, De Boelelaan 1083, 1081 HV Amsterdam, The Netherlands

<sup>†</sup> Department of Physics of Complex Systems, Laser Centre, Vrije Universiteit, De Boelelaan 1081, 1081 HV Amsterdam, The Netherlands

<sup>‡</sup> Department of Chemistry, University of Modena and Reggio Emilia, via Campi 183, 41100 Modena, Italy

<sup>§</sup> Technische Universität Berlin; Institut für Chemie, Sekr. PC14, Straße des 17. Juni 135, D-10623 Berlin, Germany.

<sup>\*</sup> Corresponding author: e-mail [zwan@few.vu.nl](mailto:zwan@few.vu.nl), phone +31(0)205987635, fax +31(0)205987543

## Contents

- (1) **Electrochemical treatment of gold electrodes (Fig. S1)**
- (2) **Gaussian distribution of surface feature dimensions on roughened silver electrodes (Fig. S2)**
- (3) **Linear plot of peak current vs. scan rate for Ag<sup>S</sup>/MUA/cyt-*c* (Fig. S3)**
- (4) **Heme reorientation probed by SERRS (Fig. S4)**
- (5) **Trumpet plots (Figs. S5 – S8)**
- (6) **Determination of the surface area of roughened silver electrodes (Fig. S9).**

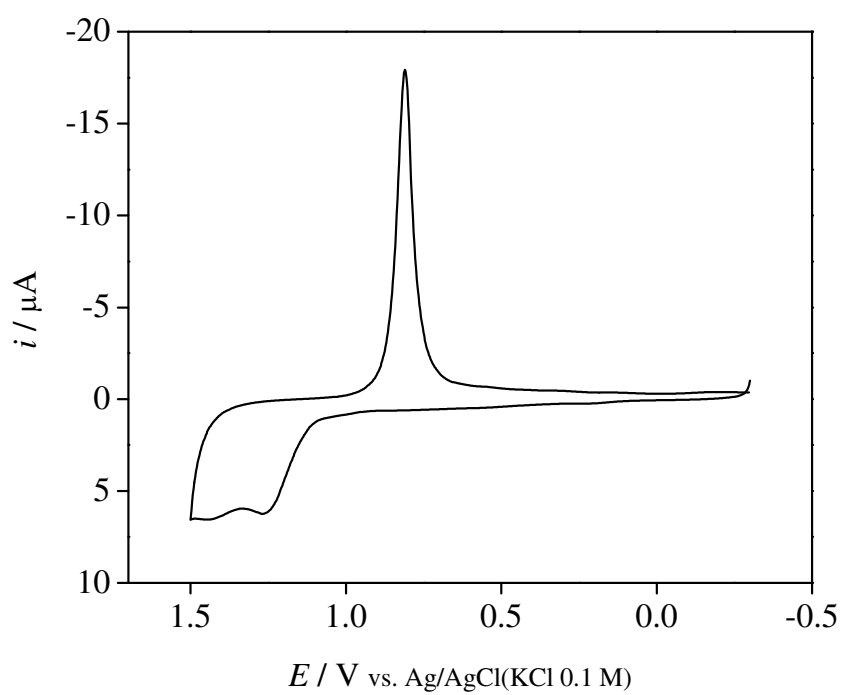

**Figure S1.** Electrochemical treatment of gold electrodes performed in 1 M  $\text{H}_2\text{SO}_4$  at scan rate of  $0.1 \text{ V s}^{-1}$ .

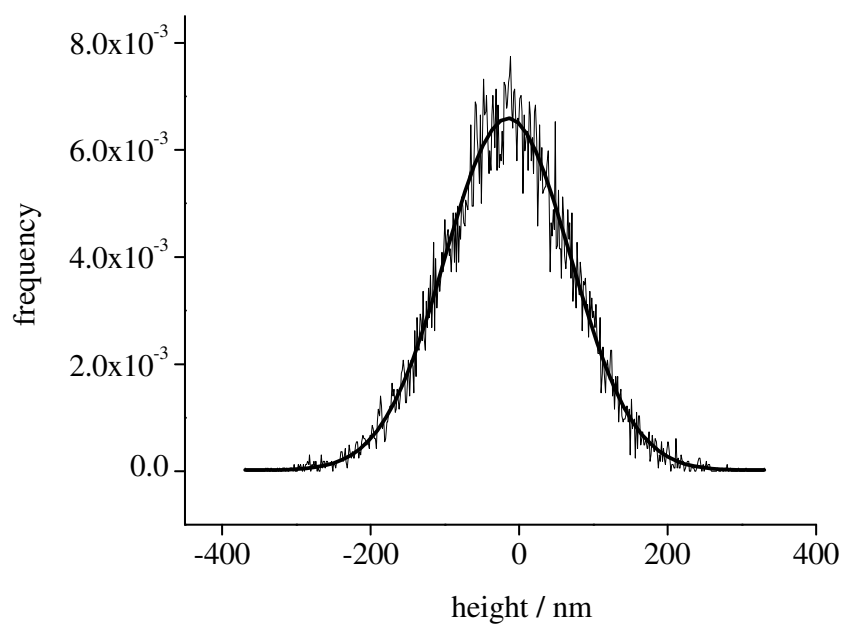

**Figure S2.** Gaussian distribution of surface feature dimensions on roughened silver electrodes. The thick solid line represents the fit to the experimental data.

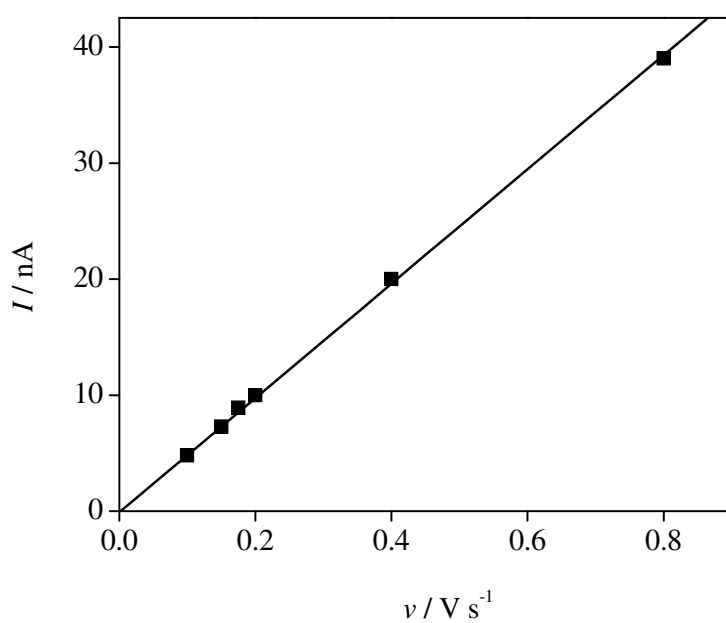

**Figure S3.** Linear plot of peak current vs. scan rate for  $\text{Ag}^{\text{S}}/\text{MUA}/\text{cyt-c}$  electrodes.

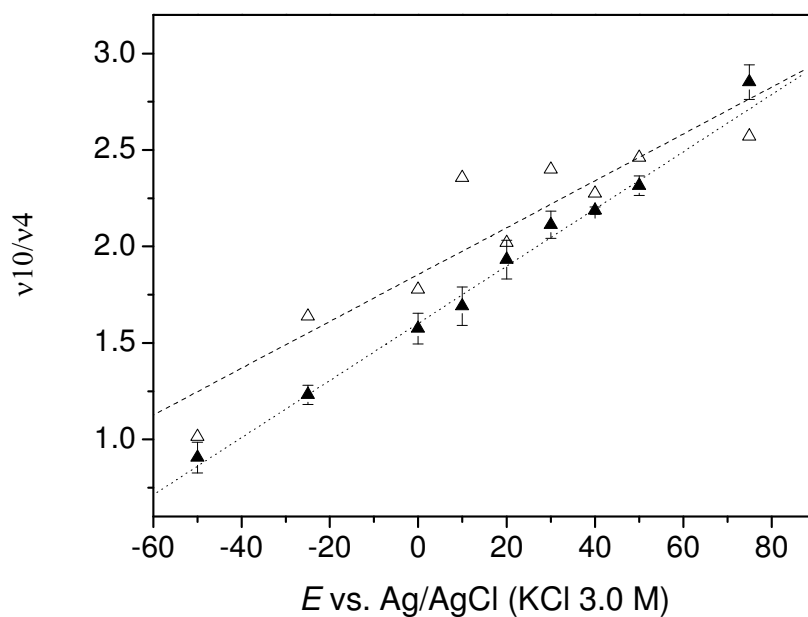

**Figure S4.** Ratio between the intensities of the  $\nu_{10}$  and  $\nu_4$  modes in the SERR spectra of of cyt-c immobilized at Ag<sup>R</sup>/MUA electrodes as a function of the applied potential immediately after protein incubation (full triangles), and after 24 hours of incubation at 4 °C in 10 mM phosphate buffer (open triangles). Potentials are expressed in mV vs. the Ag/AgCl (KCl 3.0 M). SERRS experiments were performed with 514-nm excitation.

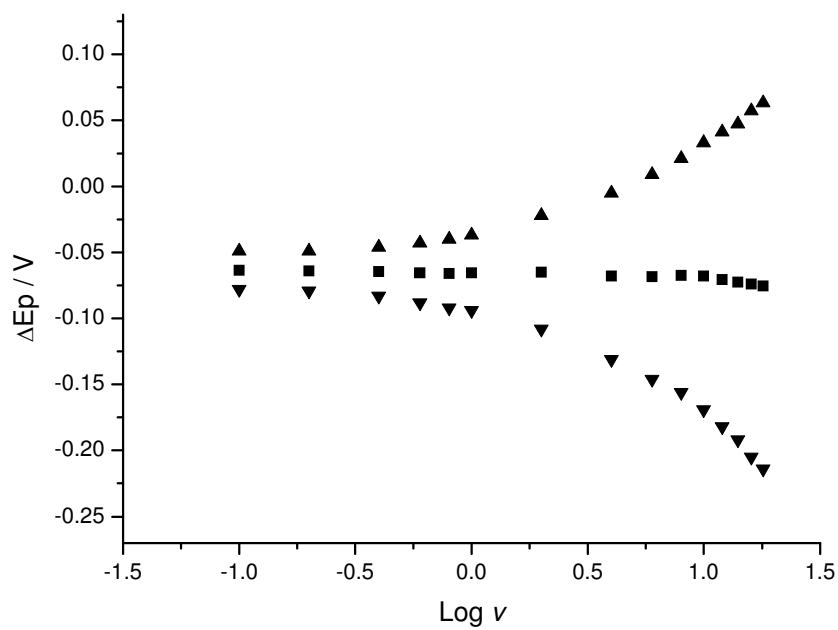

**Figure S5.** Trumpet plot for the Au/MUA/cyt-*c* system.

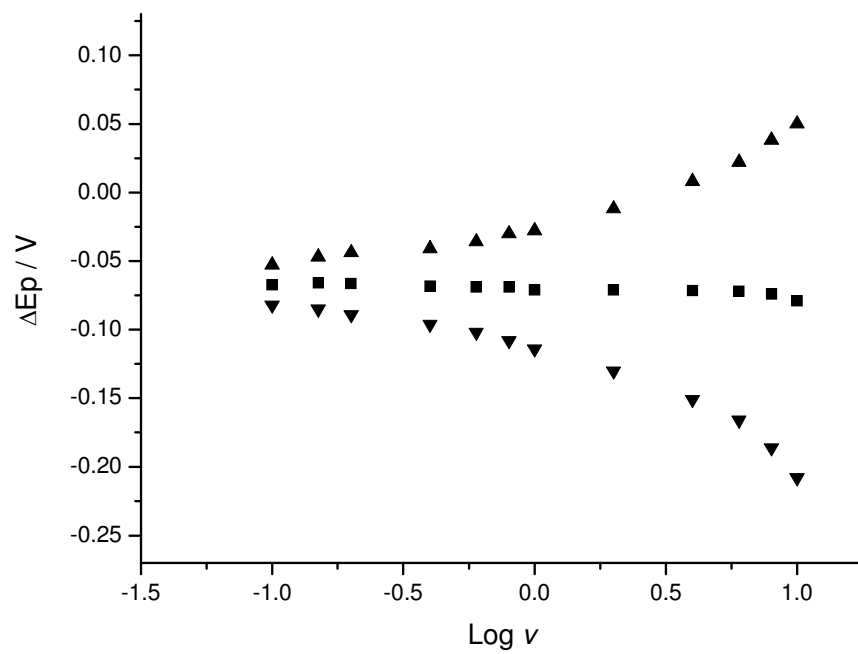

**Figure S6.** Trumpet plot for the Ag<sup>S</sup>/MUA/cyt-*c* system.

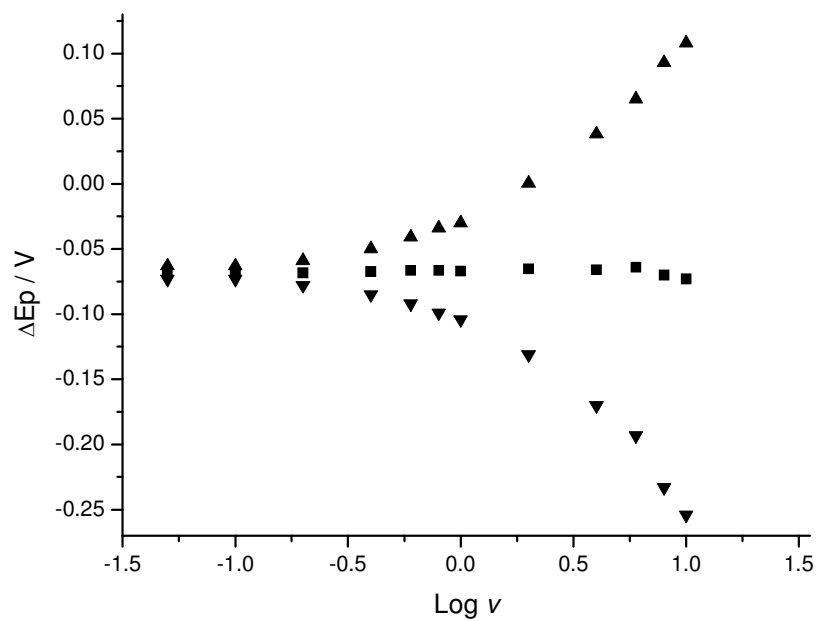

**Figure S7.** Trumpet plot for the  $\text{Ag}^{\text{R}}/\text{MUA}/\text{cyt-}c$  system immediately after protein immobilisation.

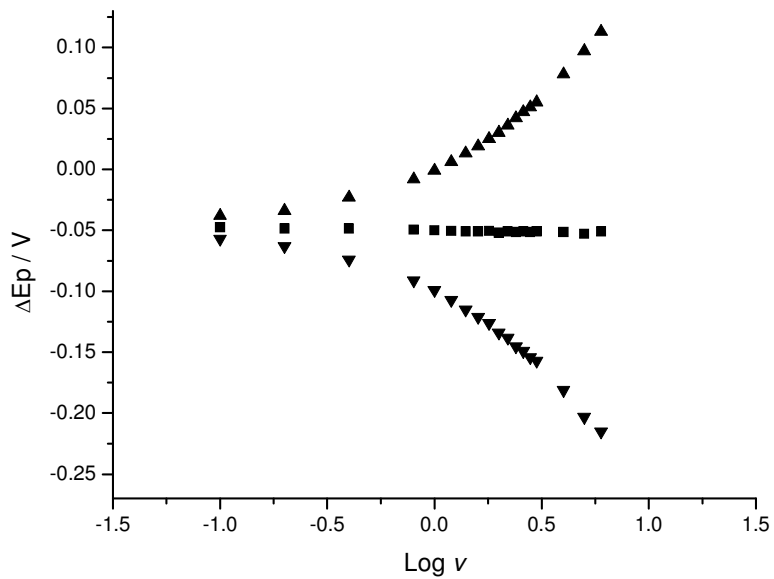

**Figure S8.** Trumpet plot for the time-dependent  $\text{Ag}^{\text{R}}/\text{MUA}/\text{cyt-}c$  system after 24 hours incubation.

### Determination of the area of roughened Ag electrodes

The area of the roughened Ag electrode was determined according the capacitive current method as described by Hupp et al. (Hupp, J. T.; Larkin, D.; Weaver, M. J. *Surf. Sci.* **1983**, 125, 429-451).

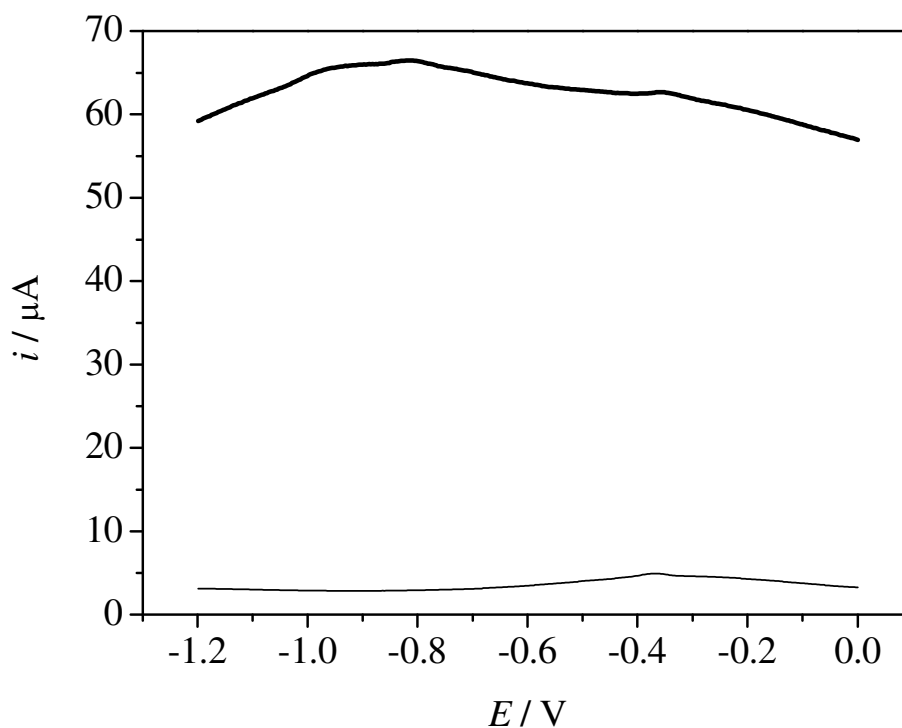

**Figure S9.** Capacitive plots of roughened (darkest trace) and smooth (lighter trace) Ag electrodes. The electrodes were treated as described in the Section 2.3. The roughening procedure described affords a roughness factor ( $R_f$ ) of  $20.6 \pm 0.8$ . The procedure adopted for the  $R_f$  determination was the same as described by Hupp *et al.* (Hupp, J. T.; Larkin, D. Weaver, M. J. *Surf. Sci.* **1983**, 125, 429-451).
